# Supplementary material for: Preliminary Technical Validation of LittleBeats™: A Multimodal Sensing Platform to Capture Cardiac Physiology, Motion, and Vocalizations
Source: Preprints.org preprint supplement (doi:10.20944/preprints202401.0906.v1), 2024-01-11
Supplement: Supplementary file 1 [file supplementary]

**Table 1S.**

Summary of Software and Algorithms used for the LittleBeats Platform and in the Technical Validation Studies

| **Paper section** | **Software/open-sourced ML model used** | **Purpose** | | |
| --- | --- | --- | --- | --- |
| Device overview | Code developed in-house in C using Adafruit Libraries | | LittleBeats data acquisition |
| Device overview | Python code developed in-house | | To pre-process the data before running the ML/signal processing algorithms |
| Studies 1 & 2 | CardioPeak & Segmenter | | To extract IBI (also called R-R peaks) from ECG data for a given session or task |
| Studies 1 & 2 | CardioEdit v1.5 | To manually edit IBI data | | |
| Studies 1 & 2 | CardioBatch Plus | To extract respiratory sinus arrythmia (RSA) values from the IBI data files | | |
| Study 3 | Sklearn | To implement ML Algorithms | |
| Study 4 | Built-in clipfix function in Audacity software | To alleviate clipping in LB audio | | |
| Study 4 | sklearn | To implement LDA algorithm to perform SER | | |
| Study 5 | Wav2vec 2.0 | To perform ASR on Rainbow Passage | | |
| Study 5 | KenLM | To implement language modeling used in ASR inference | | |

**Figure S1.** Plots of aligned interbeat intervals (IBI) from LittleBeats™ (orange line) and BIOPAC (blue line) during (a) baseline, (b) puzzle task, (c) recovery, and (d) matrices task from an adult participant (Study 1). The X and Y axes each represent time in seconds.

1. Baseline

**
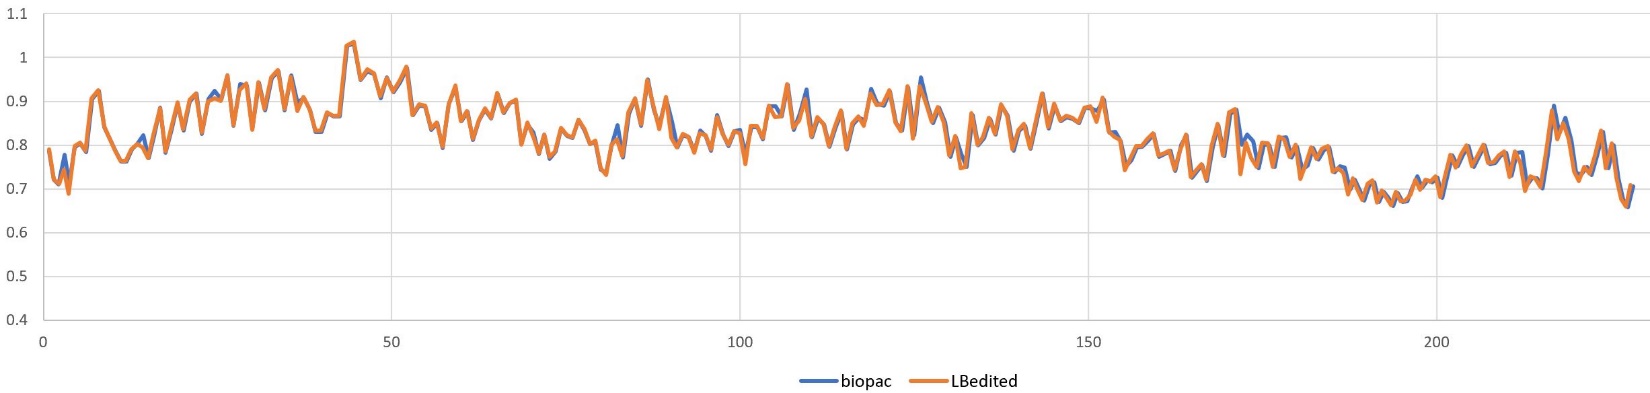
**

1. Puzzle task

**
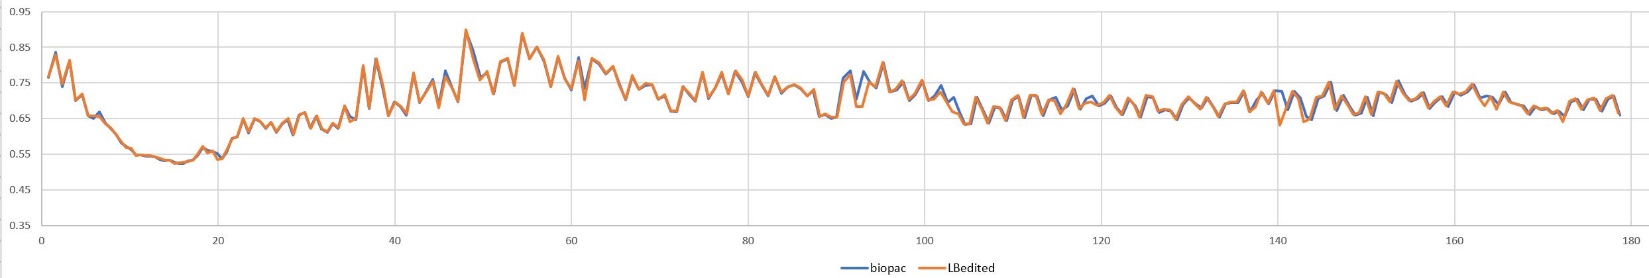
**

1. Recovery

**
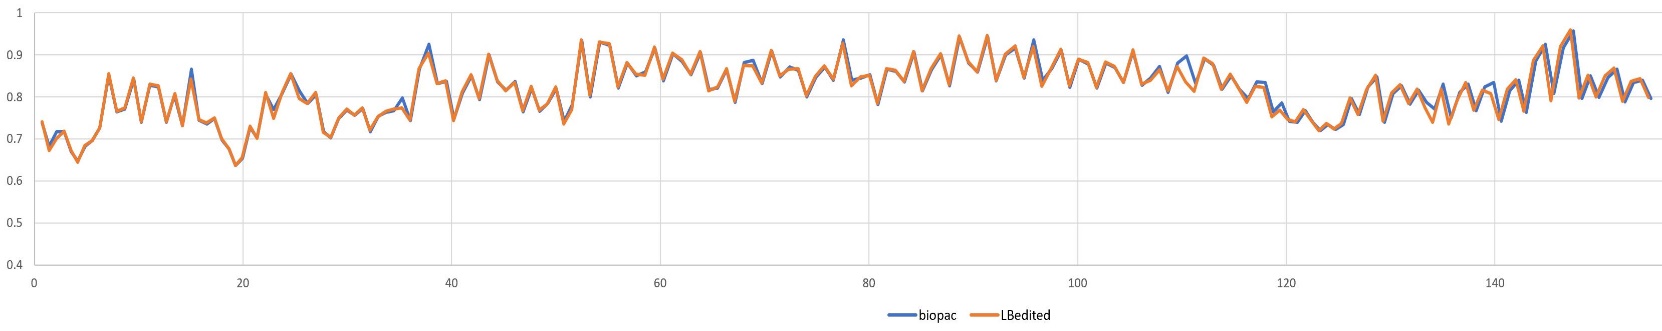
**

1. Matrices task

**
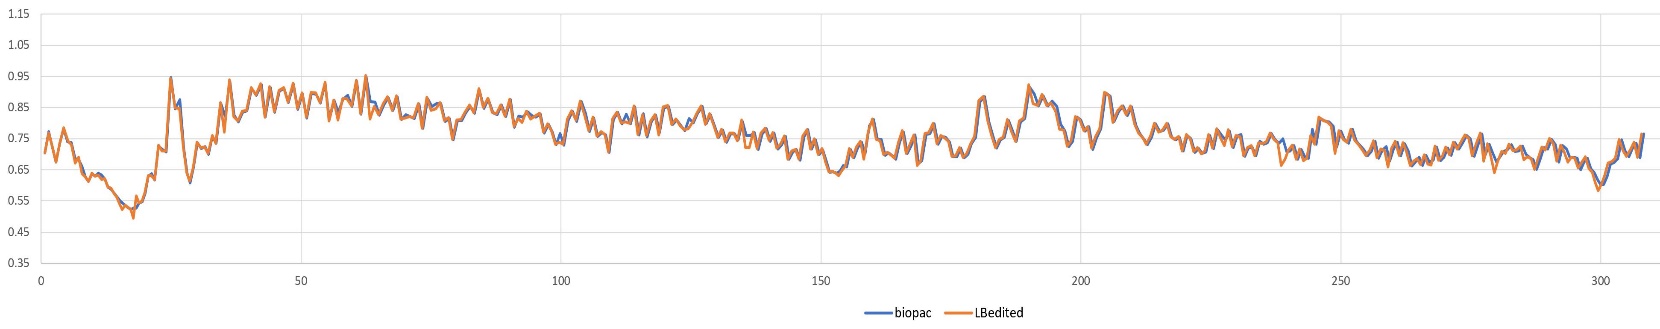
**

**Figure S2.** Plots of aligned interbeat intervals (IBI) from LittleBeats™ (orange line) and BIOPAC (blue line) during (a) baseline, (b) SFP play, (c) SFP still, and (d) SFP reunion episodes from an infant participant (Study 2). The X and Y axes each represent time in seconds.

1. **Baseline**

**
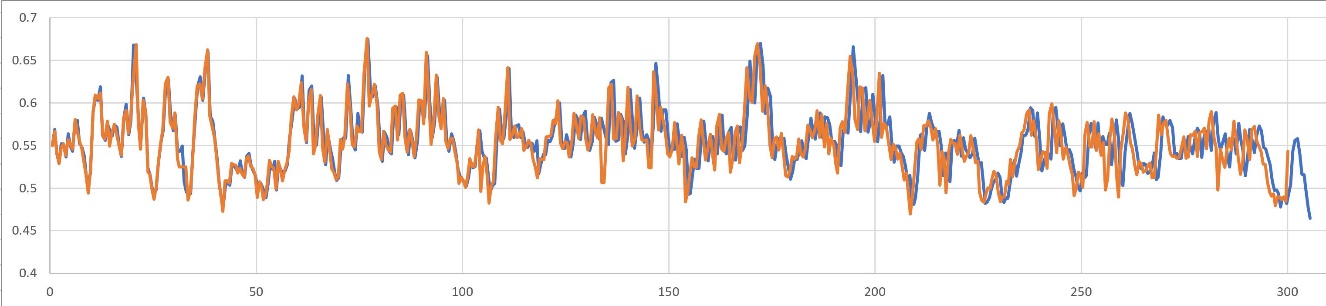
**

1. **SFP play**

**
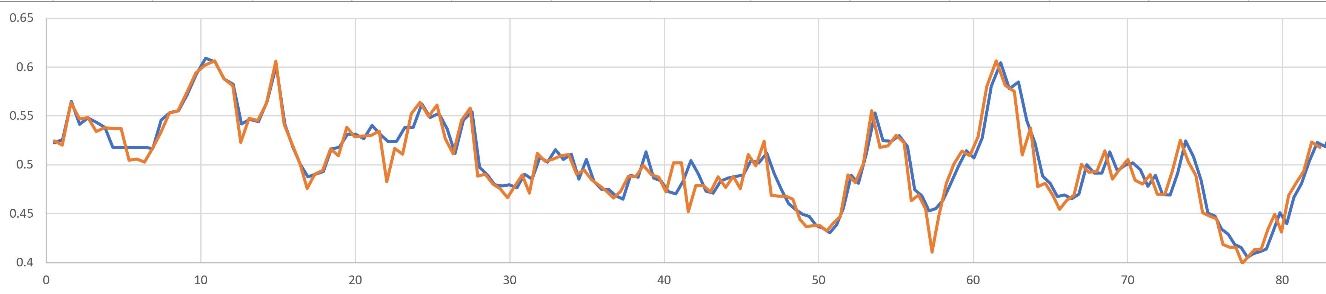
**

1. **SFP still**

**
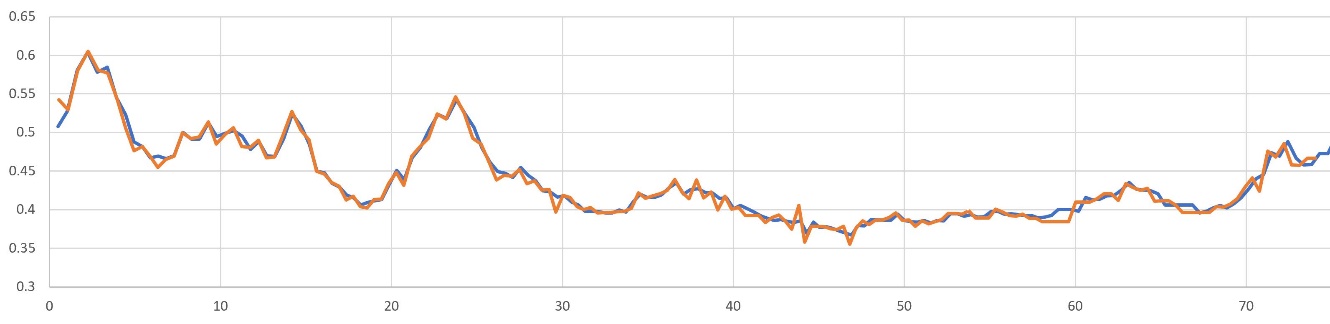
**

1. **SFP reunion**

**
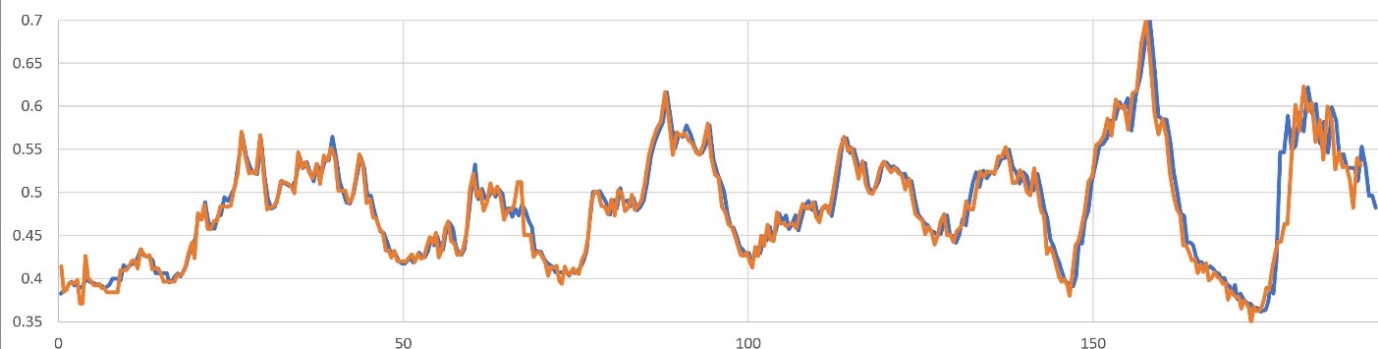
**
